# Supplementary material for: Prognostic and Immunological Role of STK38 across Cancers: Friend or Foe?
Source: Int J Mol Sci. 2022 Sep 30;23(19):11590. doi: 10.3390/ijms231911590 (PMC9570386; doi:10.3390/ijms231911590)

**Figure S1** Phylogenetic tree of *STK38*. A constraint-based multiple alignment tool of NCBI was used to obtain the phylogenetic tree of *STK38* in different species.

**Figure S2** Correlation between *STK38* gene expression and prognosis of cancers using the Kaplan-Meier plotter. Kaplan-Meier plotter was used to conduct a series of survival analyses, including OS, DMFS, RFS, PFS, PPS and FP in breast cancer (A), gastric cancer (B), lung cancer (C), liver cancer (D) and ovarian cancer (E) cases.

**Figure S3** Correlation between *STK38* expression and DNA methylation level in cervical squamous cell carcinoma (CESC), colon adenocarcinoma (COAD), esophageal carcinoma (ESCA), rectum adenocarcinoma (READ), thyroid carcinoma (THCA), uterine carcinosarcoma (UCS), pheochromocytoma and paraganglioma (PCPG), testicular germ cell tumors (TGCT), thymoma (THYM).

**Figure S4** Radar map illustrating the correlation between *STK38* expression and tumor mutational burden (TMB). The red lines represent correlation coefficients, and blue values represent ranges. Spearman correlation test, \* $p < 0.05$ , \*\* $p < 0.01$ , \*\*\* $p < 0.001$ .

**Figure S5** Radar map illustrating the relationship between *STK38* expression and microsatellite instability (MSI). The red lines represent correlation coefficients, and blue values represent ranges. Spearman correlation test, \* $p < 0.05$ , \*\* $p < 0.01$ , \*\*\* $p < 0.001$ .

Figure S1

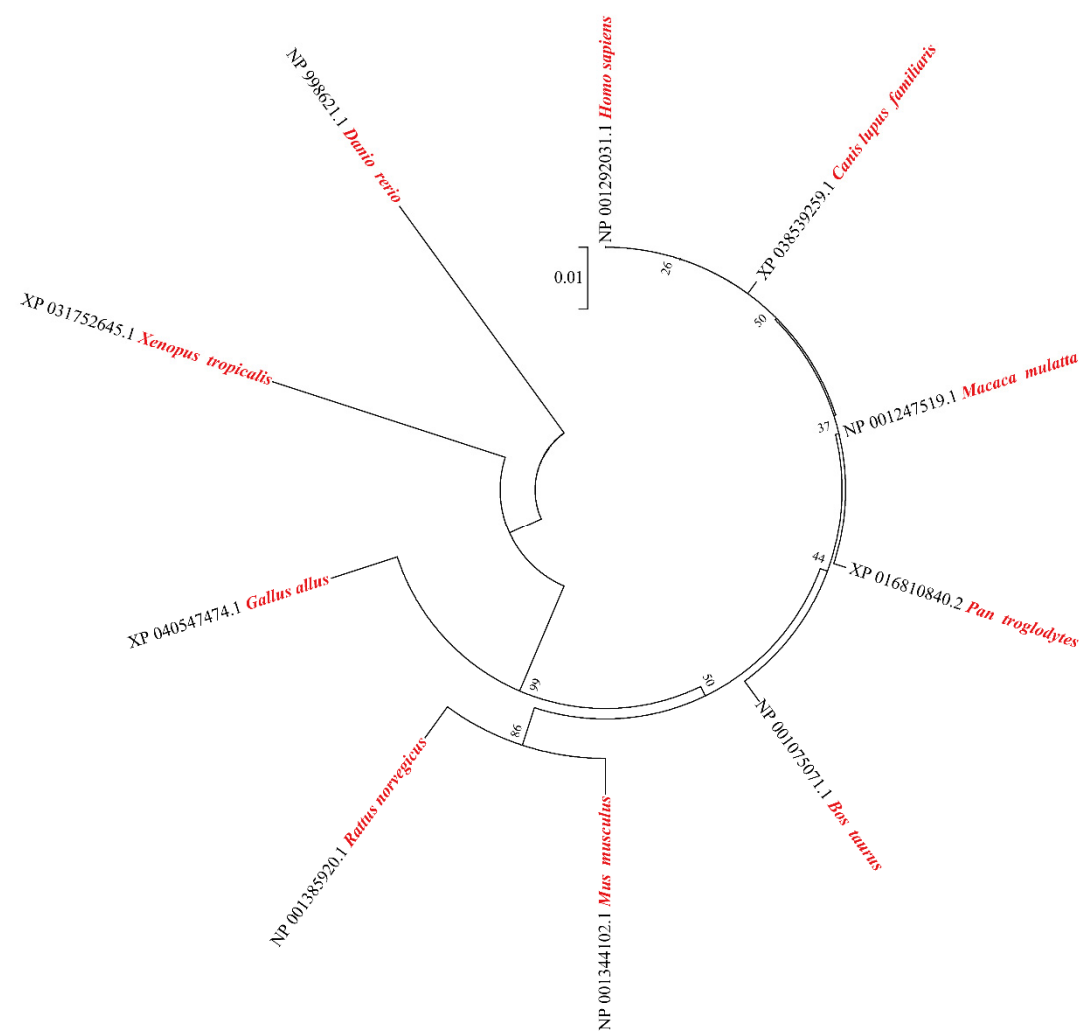

Figure S2

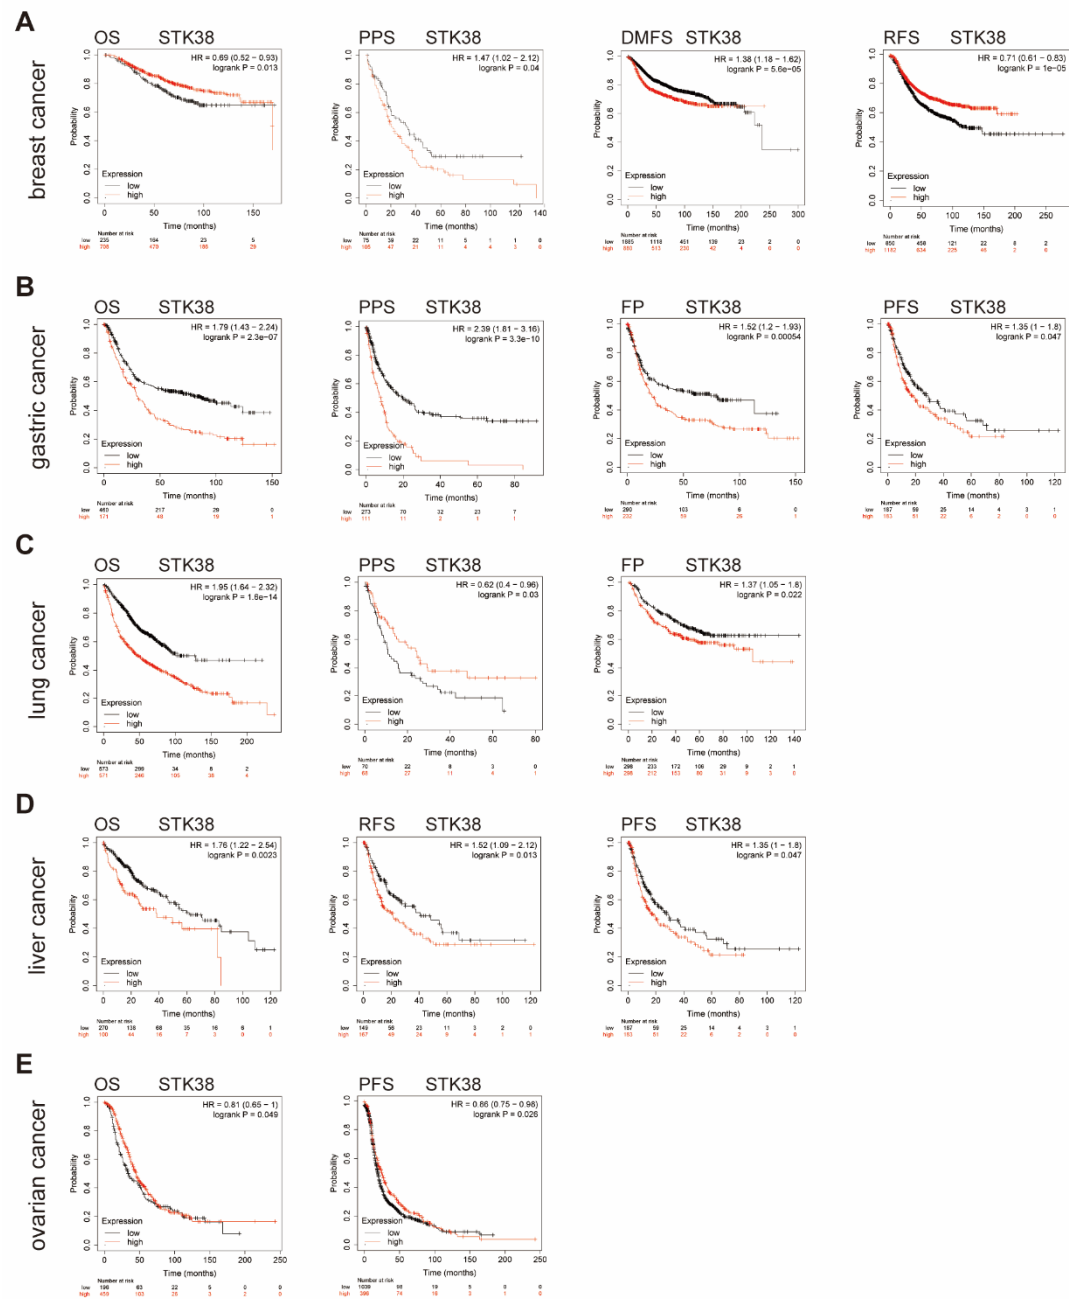

**Figure S3**

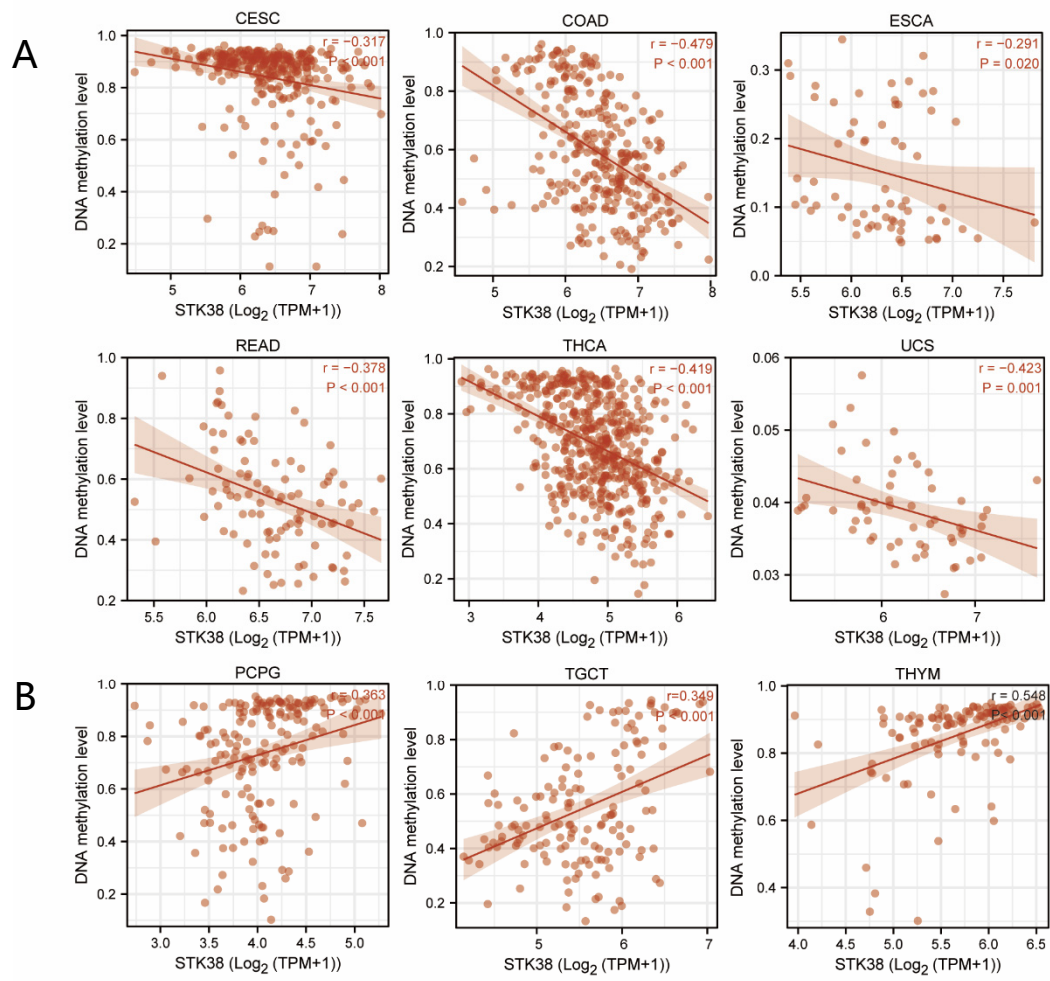

Figure S4

# TMB

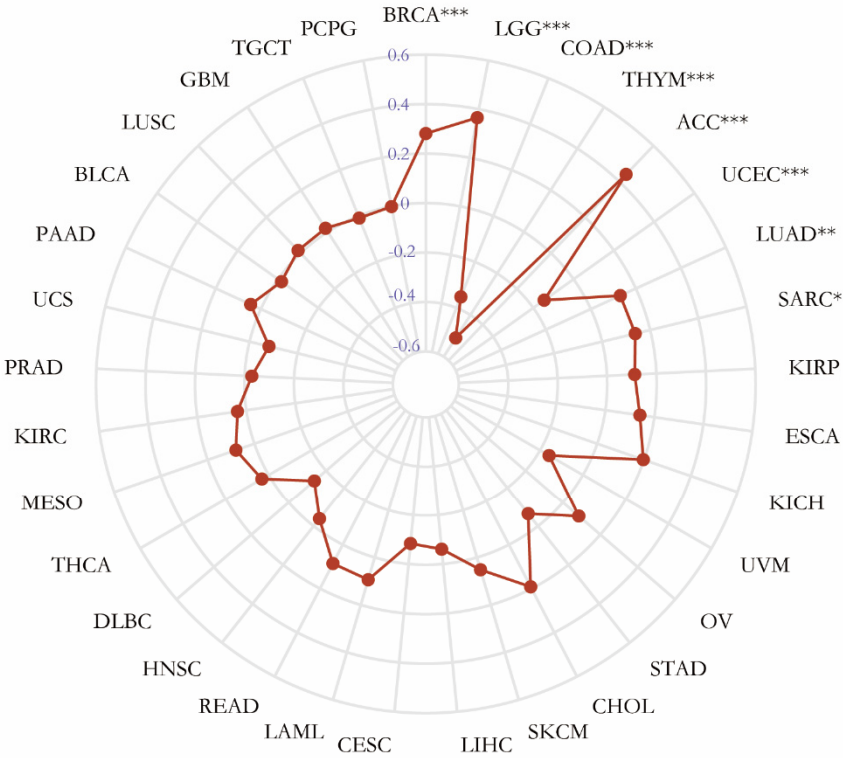

Figure S5

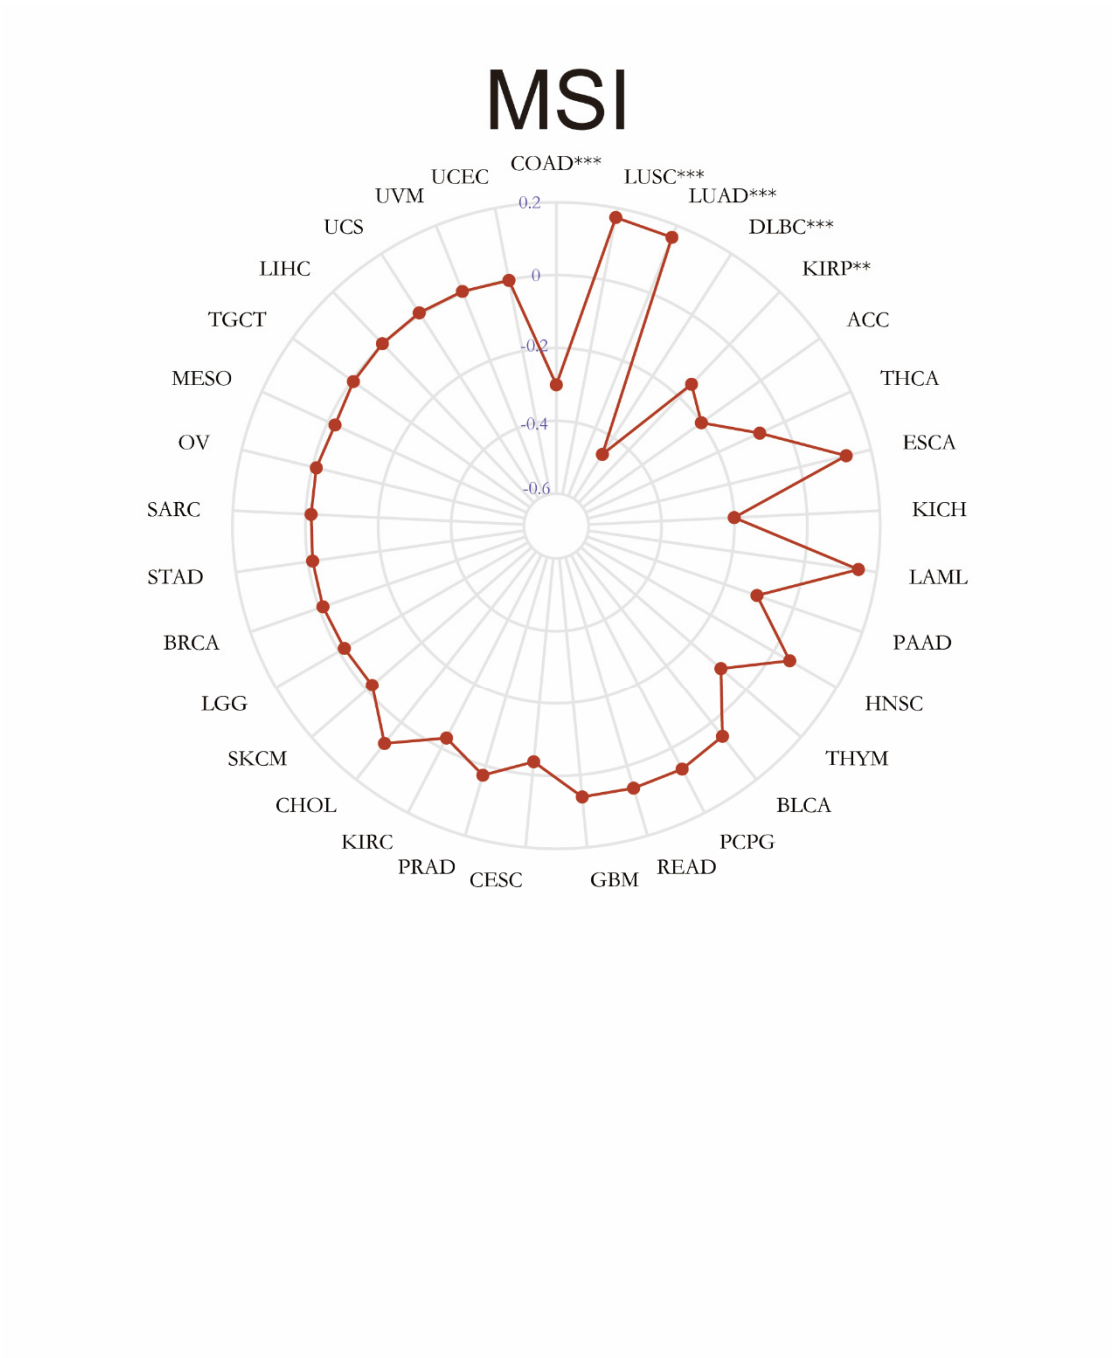

Supplement: Supplementary file 1 [file ijms-23-11590-s001.zip › ijms-1902668-supplementary.pdf]
